# Supplementary material for: Anti-staphylococcal activity and mode of action of thioridazine photoproducts
Source: PubMed Central journal article supplement (PMC7582912; doi:10.1038/s41598-020-74752-z), 2020-10-22
Supplement: 41598_2020_74752_MOESM1_ESM.pdf [file 41598_2020_74752_MOESM1_ESM.pdf]

## **Anti-staphylococcal activity and mode of action of thioridazine photoproducts**

Tatiana Tozar<sup>1,\*</sup>, Sofia Santos Costa<sup>2</sup>, Ana-Maria Udrea<sup>1,3</sup>, Viorel Nastasa<sup>1,4</sup>, Isabel Couto<sup>2</sup>, Miguel Viveiros<sup>2</sup>, Mihail Lucian Pascu<sup>1,5,\*</sup>, Mihaela Oana Romanitan<sup>6</sup>

<sup>1</sup>Laser Department, National Institute for Laser, Plasma and Radiation Physics, Magurele, Ilfov, Romania

<sup>2</sup>Global Health and Tropical Medicine, GHTM, Instituto de Higiene e Medicina Tropical, IHMT, Universidade Nova de Lisboa (UNL), Lisbon, Portugal

<sup>3</sup>Department of Anatomy, Animal Physiology and Biophysics, Faculty of Biology, University of Bucharest, Bucharest, Romania

<sup>4</sup>ELI-NP, “Horia Hulubei” National Institute for Physics and Nuclear Engineering, Magurele, Ilfov, Romania

<sup>5</sup>Faculty of Physics, University of Bucharest, Magurele, Romania

<sup>6</sup>Stockholm South General Hospital, Department of Emergency internal medicine and Neurology, Karolinska Institute

Stroke Research Network at Södersjukhuset, 118 83 Stockholm, Sweden

\*Corresponding author: [mihai.pascu@inflpr.ro](mailto:mihai.pascu@inflpr.ro); [tatiana.alexandru@inflpr.ro](mailto:tatiana.alexandru@inflpr.ro) Tel./Fax: +40 21 457 5739

Table S1 presents the results regarding the capacity of unirradiated and irradiated TZ solutions to inhibit the efflux pumps of *S. epidermidis* ATCC 12228 EtBr and *S. aureus* ATCC 25923 (MSSA) EtBr.

Table S1. Efflux pump inhibitory effect of TZ against Gram-positive bacteria. TZ<sub>*i*</sub> represents TZ solution irradiated *i* minutes, *i*=1-240 min, ½MIC represents half of TZ<sub>*i*</sub> MIC value against the corresponding strain, and ¼MIC represents one quarter of the TZ<sub>*i*</sub> MIC value against the corresponding strain.

| Strain / Compound         | <i>S. epidermidis</i><br>ATCC 12228 | <i>S. epidermidis</i><br>ATCC 12228<br>EtBr | <i>S. aureus</i><br>ATCC 25923<br>(MSSA) | <i>S. aureus</i><br>ATCC 25923<br>(MSSA) EtBr |
|---------------------------|-------------------------------------|---------------------------------------------|------------------------------------------|-----------------------------------------------|
| CIP                       | 0.125                               | 4                                           | 0.25                                     | 2                                             |
| TZ <sub>0</sub> - ½ MIC   | 0.125                               | 4                                           | 0.25                                     | 1                                             |
| TZ <sub>0</sub> - ¼ MIC   | 0.125                               | 4                                           | 0.25                                     | 2                                             |
| TZ <sub>15</sub> - ½ MIC  | 0.125                               | 4                                           | 0.25                                     | 2                                             |
| TZ <sub>15</sub> - ¼ MIC  | 0.125                               | 4                                           | 0.25                                     | 2                                             |
| TZ <sub>30</sub> - ½ MIC  | 0.125                               | 4                                           | 0.25                                     | 2                                             |
| TZ <sub>30</sub> - ¼ MIC  | 0.125                               | 4                                           | 0.25                                     | 2                                             |
| TZ <sub>60</sub> - ½ MIC  | 0.125                               | 4                                           | 0.25                                     | 2                                             |
| TZ <sub>60</sub> - ¼ MIC  | 0.125                               | 4                                           | 0.25                                     | 2                                             |
| TZ <sub>120</sub> - ½ MIC | 0.125                               | 4                                           | 0.25                                     | 2                                             |
| TZ <sub>120</sub> - ¼ MIC | 0.125                               | 4                                           | 0.25                                     | 2                                             |
| TZ <sub>180</sub> - ½ MIC | 0.125                               | 4                                           | 0.25                                     | 2                                             |
| TZ <sub>180</sub> - ¼ MIC | 0.125                               | 4                                           | 0.25                                     | 2                                             |
| TZ <sub>240</sub> - ½ MIC | 0.125                               | 4                                           | 0.25                                     | 2                                             |
| TZ <sub>240</sub> - ¼ MIC | 0.125                               | 4                                           | 0.25                                     | 2                                             |
